# Supplementary material for: Photochemical production and characterisation of the radical ions of tetraphenylporphycenes
Source: Royal Society of Chemistry journal article supplement (doi:10.1039/b517686g), 2006-02-08
Supplement: b517686g.pdf [file b517686g.pdf]

# Photochemical production and characterization of the radical ions of tetraphenylporphycenes

Noemí Rubio,<sup>a</sup> José I. Borrell,<sup>a</sup> Jordi Teixidó,<sup>a</sup> Magdalena Cañete,<sup>b</sup> Ángeles Juarranz,<sup>b</sup> Ángeles Villanueva,<sup>b</sup> Juan C. Stockert<sup>b</sup> and Santi Nonell<sup>\*a</sup>

<sup>a</sup> Grup d'Enginyeria Molecular, Institut Químic de Sarrià, Universitat Ramon Llull, Via Augusta 390, 08017 Barcelona, Spain . Fax: +34-93-205-62-66; Tel: +34-93-267-20-00; E-mail: s.nonell@iqs.url.edu

<sup>b</sup> Departamento de Biología, Facultad de Ciencias, Universidad Autónoma de Madrid, 28049 Madrid, Spain.

## TPPo<sup>•-</sup>: Time-absorbance-wavelength matrix

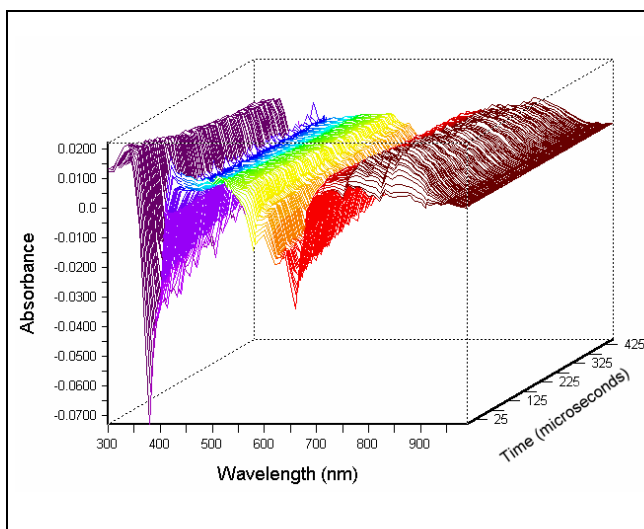

3-D plot of the changes of absorbance as a function of time and wavelength on going from <sup>3</sup>TPPo to TPPo<sup>•-</sup>, after addition of TMPD. This matrix was built from the transients monitored at 50 μs/division.

## PdTPPo<sup>•-</sup>: Time-absorbance-wavelength matrix

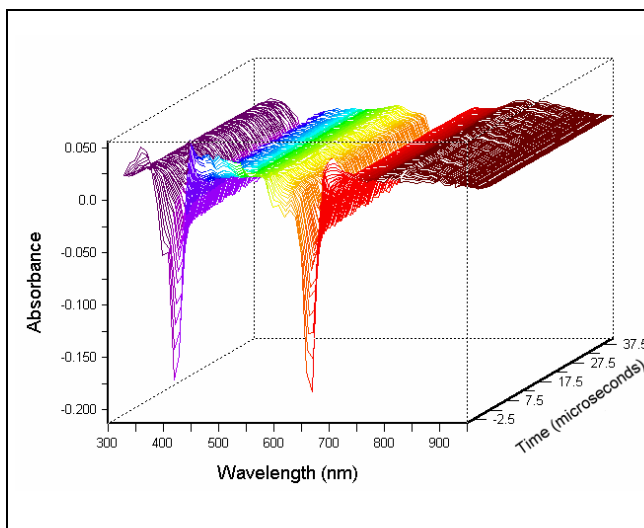

3-D plot of the changes of absorbance as a function of time and wavelength on going from <sup>3</sup>PdTPPo to PdTPPo<sup>•-</sup>, after addition of TMPD. This matrix was built from the transients monitored at 20 μs/division.

### TPPo<sup>•+</sup> (PhCN): Time-absorbance-wavelength matrix

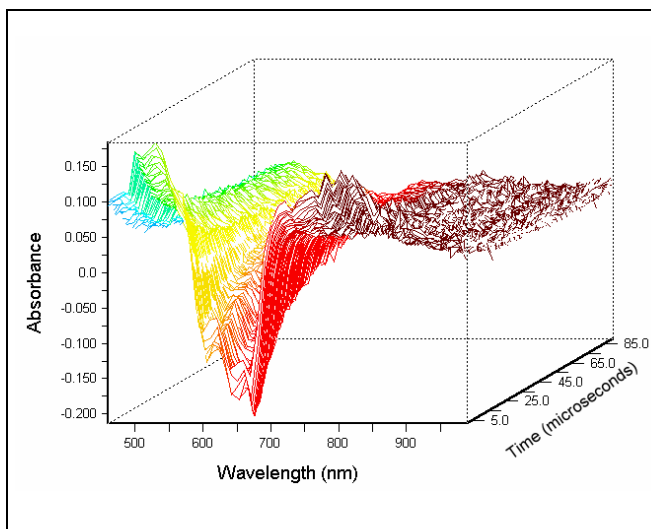

3-D plot of the changes of absorbance as a function of time and wavelength when the system MA<sup>+</sup>/BP/TPPo (PhCN) was irradiated at 455 nm to form TPPo<sup>•+</sup>. This matrix was built from transients monitored at 10  $\mu$ s/division.

### TPPo<sup>•+</sup> (HFP): Time-absorbance-wavelength matrix

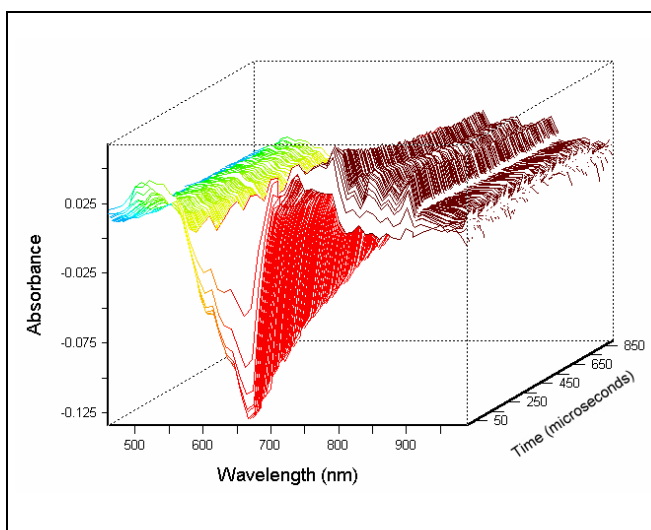

3-D plot of the changes of absorbance as a function of time and wavelength when the system MA<sup>+</sup>/BP/TPPo (HFP) was irradiated at 455 nm to form TPPo<sup>•+</sup>. This matrix was built from the transients monitored at 0.1 ms/division.

### **PdTPPo<sup>•+</sup> (PhCN): Time-absorbance-wavelength matrix**

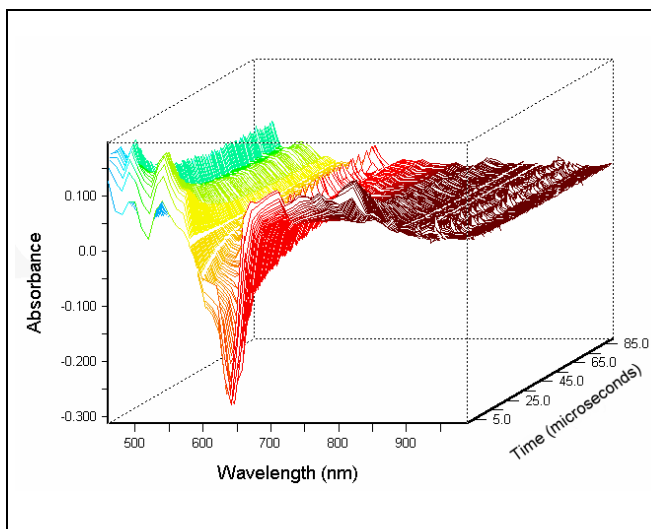

3-D plot of the changes of absorbance as a function of time and wavelength when the system MA<sup>+</sup>/BP/PdTPPo (PhCN) was irradiated at 450 nm to form PdTPPo<sup>•+</sup>. This matrix was built from the transients monitored at 10  $\mu$ s/division.

### **PdTPPo<sup>•+</sup> (HFP): Time-absorbance-wavelength matrix**

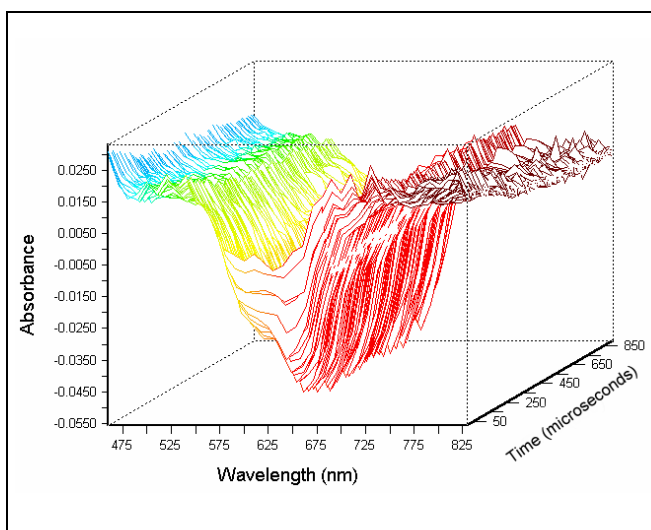

3-D plot of the changes of absorbance as a function of time and wavelength when the system MA<sup>+</sup>/BP/PdTPPo (HFP) was irradiated at 450 nm to form PdTPPo<sup>•+</sup>. This matrix was built from the transients monitored at 0.1 ms/division.
